# Supplementary material for: The biogeography of relative abundance of soil fungi and bacteria in top surface soil
Source: Copernicus journal article supplement (doi:10.5194/essd-2022-128), 2022-04-19
Supplement: Supplementary file 1 [file essd-2022-128-supplement.pdf]

# 1 **The biogeography of relative abundance of soil fungi and bacteria in top surface soil**

## 2 **SUPPORTING ONLINE MATERIAL**

### 3 **Classification of vegetation biomes and vegetation types**

4 Following the approach by Olson et al. 2006, vegetation biomes where the soil samples were  
5 collected were classified into tundra, boreal forests, montane grasslands, temperate conifer  
6 forests, temperate grasslands, temperate broadleaf forests, tropical forests, and Mediterranean  
7 & deserts. Mediterranean and deserts had low sample sizes and thus were combined into one  
8 vegetation biome. To determine the vegetation types in locations where the soil samples were  
9 collected, we used the Global 1-km Consensus Land Cover map<sup>2</sup>. The land cover map  
10 classifies vegetation or land cover types into Evergreen/Deciduous Needleleaf Trees,  
11 Evergreen Broadleaf Trees, Deciduous Broadleaf Trees, Mixed/Other Trees, Shrubs,  
12 Herbaceous Vegetation, Cultivated and Managed Vegetation, Regularly Flooded Vegetation,  
13 Urban/Built-up, Snow/Ice, Barren, and Open Water. We summed up the vegetation types of  
14 Evergreen/Deciduous Needleleaf Trees, Evergreen Broadleaf Trees, Deciduous Broadleaf  
15 Trees, Mixed/Other Trees and Shrubs to derive the total woody plant cover. To represent  
16 human activities (or land usage change), we used land cover of Cultivated and Managed  
17 Vegetation to derive the managed cover. Total vegetation cover is the sum of woody,  
18 herbaceous and managed vegetation cover. Then we classified our soil sample locations into  
19 vegetation types or ecosystems dominated by woody vegetation, managed vegetation, and  
20 herbaceous vegetation. To this end, we tested various thresholds of vegetation cover values  
21 and chose the one without overlaps among different vegetation types. That is, if the total  
22 vegetation cover was less than 20% or the cover of barren soil was greater than 50%, it was  
23 classified as barren soil. If the woody vegetation cover was larger than 20% and larger than  
24 the managed vegetation cover, it was classified into the vegetation type or ecosystem  
25 dominated by woody vegetation. If the managed vegetation cover was larger than 20% and

26 larger than the woody vegetation cover, it was classified into the vegetation type or ecosystem  
27 dominated by managed vegetation. The rest of sample sites were classified into herbaceous  
28 vegetation dominated ecosystem, if herbaceous vegetation cover was larger than 20%.

### 29 **Environmental drivers**

30  
31 Based on previous studies<sup>3-5</sup>, variables or covariates of climate, soil and human activities  
32 which likely affect F:B ratio or fungal proportion were selected for this study. They include  
33 climate conditions (aridity index, mean annual precipitation-MAP, mean annual temperature-  
34 MAT), soil properties (clay, silt and sand content, soil organic carbon-SOC, soil C:N ratio,  
35 pH, cation exchange capacity), vegetation index (net primary productivity-NPP, woody  
36 vegetation cover, herbaceous vegetation cover), and human activities (managed vegetation  
37 cover). All of these variables were derived from the global layers based on georeferenced  
38 coordinates of aggregated soil sample at 30 arc-seconds resolution. Machine-learning  
39 algorithm Random Forest was then used to determine variable importance for these 12  
40 variable (Breiman 2001). We ran 1000 simulations of machine-learning algorithm random  
41 forest and reported mean values of mean decrease in accuracy (%IncMSE) and mean decrease  
42 gini (IncNodePurity) with 95% confidence interval. The greater the values of %IncMSE and  
43 IncNodePurity are, the more important the variables are.

### 44 **Machine learning**

45  
46 Fungal proportion has the largest sample size (n = 3224 samples) and is the focus of our  
47 study. Because of better predictive strength, we used machine learning (random forest) to  
48 generate a spatially explicit map of fungal proportion at a global scale. The distinct soil  
49 samples (n = 3224) falling within the same 30 arc-seconds (~1-km<sup>2</sup>) pixel were aggregated as  
50 an average, thus resulting in a total of 946 unique pixels across global as inputs into the  
51 geospatial modelling.

52 To generate a quantitative and mechanistic understanding of environmental controls on

53 fungal proportion across landscapes, we used a stack of ecologically relevant, global map  
54 layers including climatic, soil nutrient, soil chemical, soil physical, vegetative indices,  
55 radiation and topographic variables and anthropogenic covariates (Supplementary Table 1).  
56 All of these covariate map layers were standardized at 30 arc-seconds resolution ( $\approx 1$ km at the  
57 equator). When these global layers' resolution is higher than 30 arc-seconds, we  
58 downsampled these layers using a mean aggregation method. In contrast, if layers have a  
59 lower original resolution, we resampled these layers using simple upsampling (i.e., without  
60 interpolation) to align with the higher resolution grid. Each sample (plot)-specific  
61 independent variables were then derived from these ecologically relevant, global map layers  
62 based on each sample' georeferenced location.

63 The soil samples used for measuring soil microbes were collected from top soil surface  
64 (0-10/15 cm). To approximate the sampling soil depth, we thus used the soil variable at soil  
65 depth of 15 cm, thus resulting in a total of 90 ecologically relevant, global map layers.  
66 Geospatial modelling was used to investigate the dependence of fungal proportion on the 90  
67 covariates. We followed recent advancements in machine learning for spatial prediction<sup>6</sup>, and  
68 used random forest with a variety of parameters (i.e., variablesPerSplit 2, 3, 4, 5, 8, 10) to  
69 train the models and assessed each model using k-fold cross validation (with  $k = 10$ ). This  
70 allowed us to quantify the coefficient of determination values for each fold of data in each  
71 model. Then we determined the mean and standard deviation values for the cross validated  
72 models. The model with the highest coefficient of determination values and lowest standard  
73 deviation were selected as the best model. The results showed that the final (best) model had a  
74 remarkably high strength of prediction (mean cross-validation  $R^2 = 0.43$ , standard deviation =  
75 0.09). The "best model" with the highest coefficient of determination values and lowest  
76 standard deviation were then used to spatially explain the fungal proportion at a global  
77 scale, with the derived 90 covariates on all the soil samples ( $n = 946$ ). The results showed

78 again that the best performing model had remarkably high predictive strength at a global scale  
79 (overall  $R^2 = 0.90$ ).

80 To account for the potential role of land usage change, we used the subset of data  
81 including only natural ecosystems ( $n = 1795$ ) and aggregated the samples at 30 arc-seconds  
82 ( $\sim 1\text{-km}^2$ ) resolution as an average. We then used machine learning (random forest) to  
83 generate a spatially explicit map of fungal proportion at a global scale, using the derived 90  
84 covariates on all the soil samples ( $n = 716$ ) (Extended Fig. 1). The predictive strength of using  
85 data of natural ecosystems was lower than the case of using full dataset. But it still had good  
86 predictive strength with mean cross-validation  $R^2 = 0.35$  and a final best model  $R^2 = 0.91$   
87 (Extended Fig. 9). In view of the minimal difference of the two scenarios, the main text  
88 reported results from the full dataset, whereas results from only the natural ecosystems was  
89 reported in the supplementary materials.

90

91

92

93

94

95

96

97

98

99

100 **References**

- 101 1. Olson, D. M. *et al.* Terrestrial Ecoregions of the World: A New Map of Life on Earth.  
102 *Bioscience* **51**, 933 (2006).
- 103 2. Tuanmu, M. N. & Jetz, W. A global 1-km consensus land-cover product for  
104 biodiversity and ecosystem modelling. *Glob. Ecol. Biogeogr.* **23**, 1031–1045 (2014).
- 105 3. de Vries, F. T. *et al.* Abiotic drivers and plant traits explain landscape-scale patterns in  
106 soil microbial communities. *Ecol. Lett.* **15**, 1230–1239 (2012).
- 107 4. Chen, Y. L. *et al.* Patterns and drivers of soil microbial communities in Tibetan alpine  
108 and global terrestrial ecosystems. *J. Biogeogr.* **43**, 2027–2039 (2016).
- 109 5. Drenovsky, R. E., Steenwerth, K. L., Jackson, L. E. & Scow, K. M. Land use and  
110 climatic factors structure regional patterns in soil microbial communities. *Glob. Ecol.*  
111 *Biogeogr.* **19**, 27–39 (2010).
- 112 6. Hengl, T., Nussbaum, M., Wright, M. N., Heuvelink, G. B. M. & Gräler, B. Random  
113 forest as a generic framework for predictive modeling of spatial and spatio-temporal  
114 variables. *PeerJ* **6**, e5518 (2018).

115

116

117

118

119

120

121

122

123

124

125

126

127

128

129

130

131

132

133

134

135

136

137

138

139

140

141

142

143

144

145

146

147

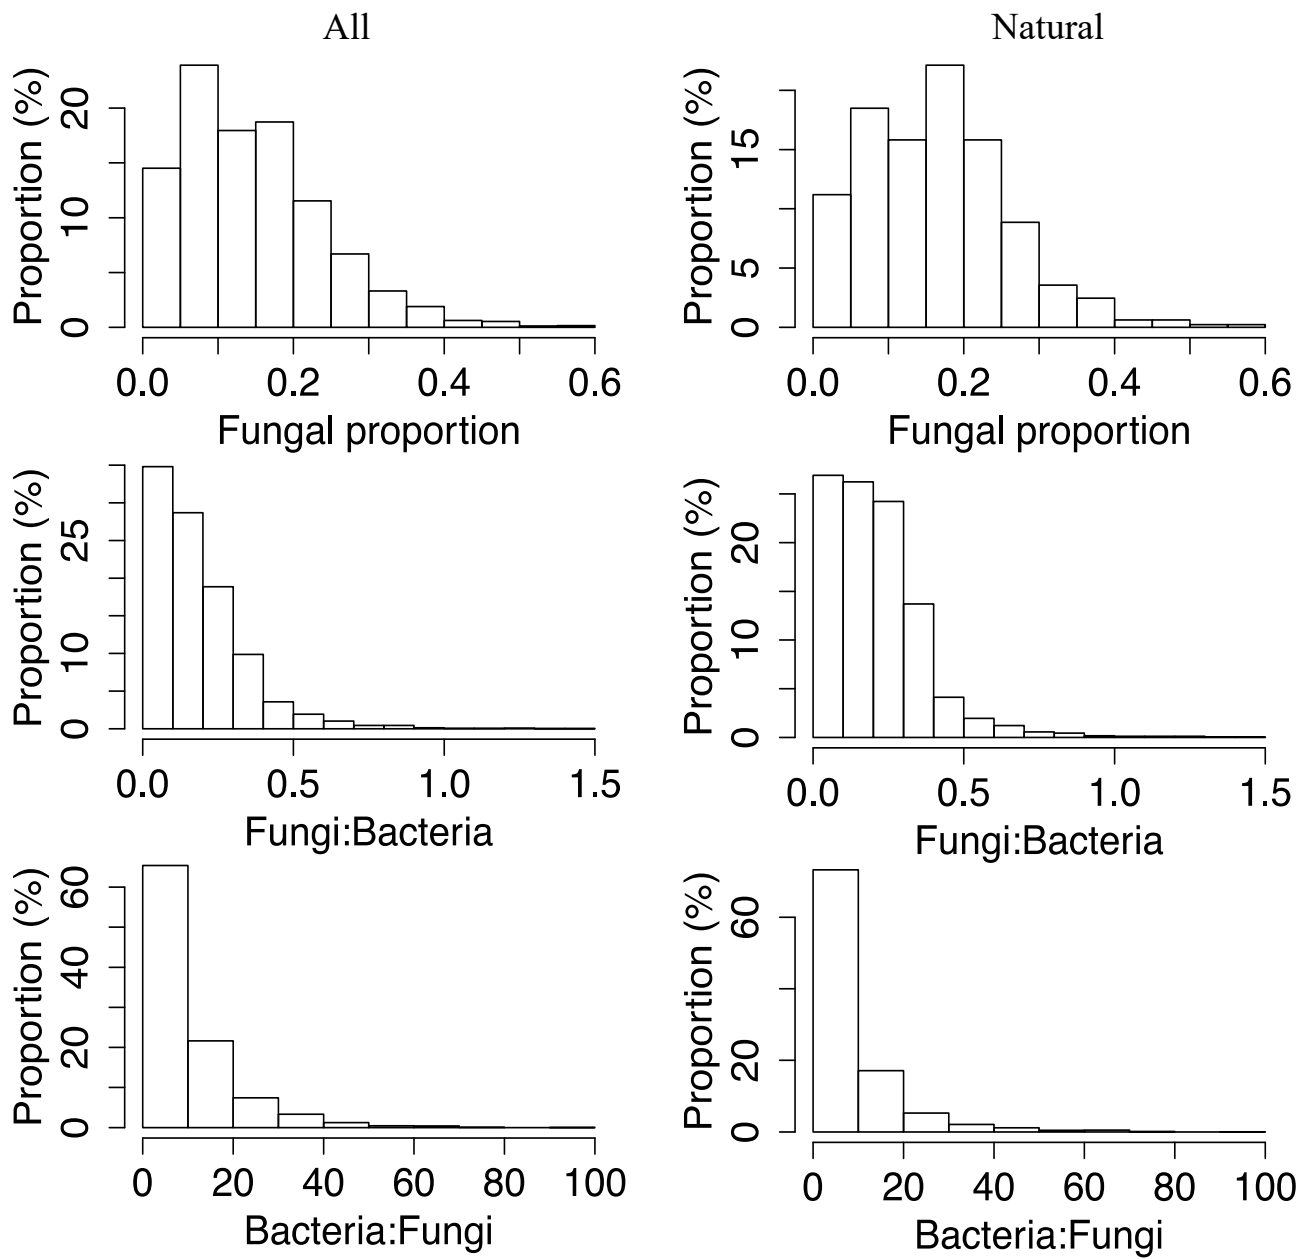

**Fig. S1 Frequency distribution (%) of proportion of fungi, fungal and bacterial ratio**

**and bacterial and fungal ratio.** The data is derived from the original distinct soil samples (n

= 3224 for all data and n = 1795 for natural ecosystems) before aggregation.

148  
149  
150  
151  
152  
153  
154  
155  
156  
157  
158  
159  
160  
161  
162  
163  
164  
165  
166  
167  
168  
169  
170  
171  
172  
173  
174  
175  
176  
177  
178  
179  
180  
181  
182  
183  
184

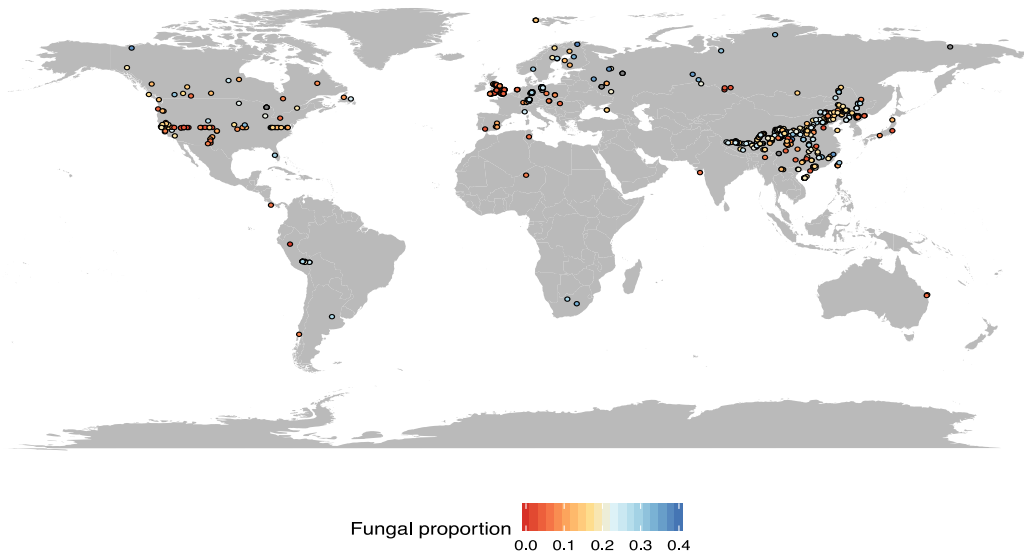

**Fig. S2 Map of sample locations for fungal proportion using natural ecosystems.** All data points (n = 1795) falling within the same 30 arc-seconds (~1-km<sup>2</sup>) pixel were aggregated via an average (n = 716).

185  
186  
187  
188  
189  
190  
191  
192  
193  
194  
195  
196  
197  
198  
199  
200  
201  
202  
203  
204  
205  
206  
207  
208  
209

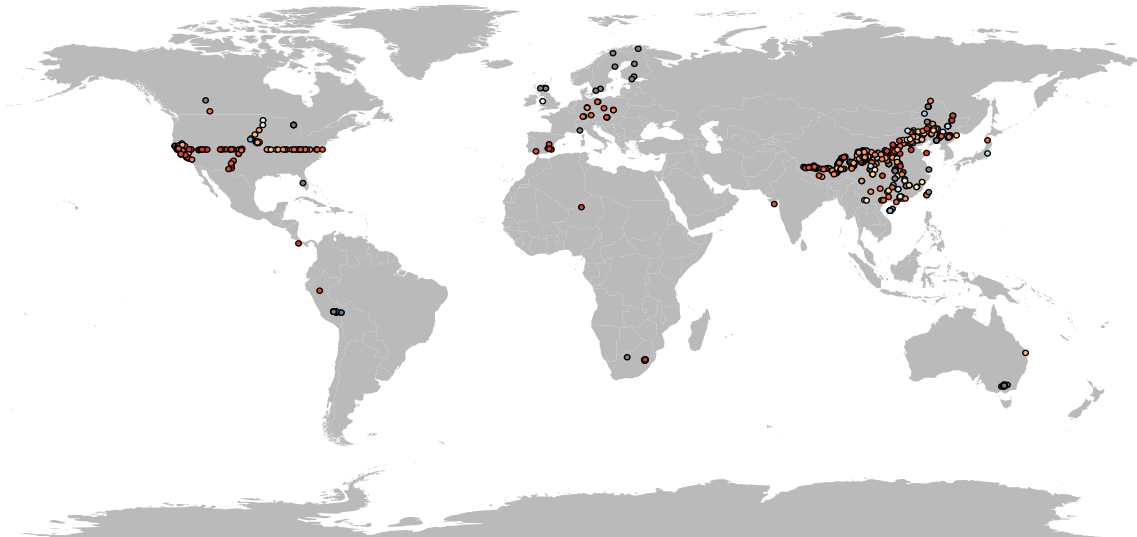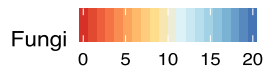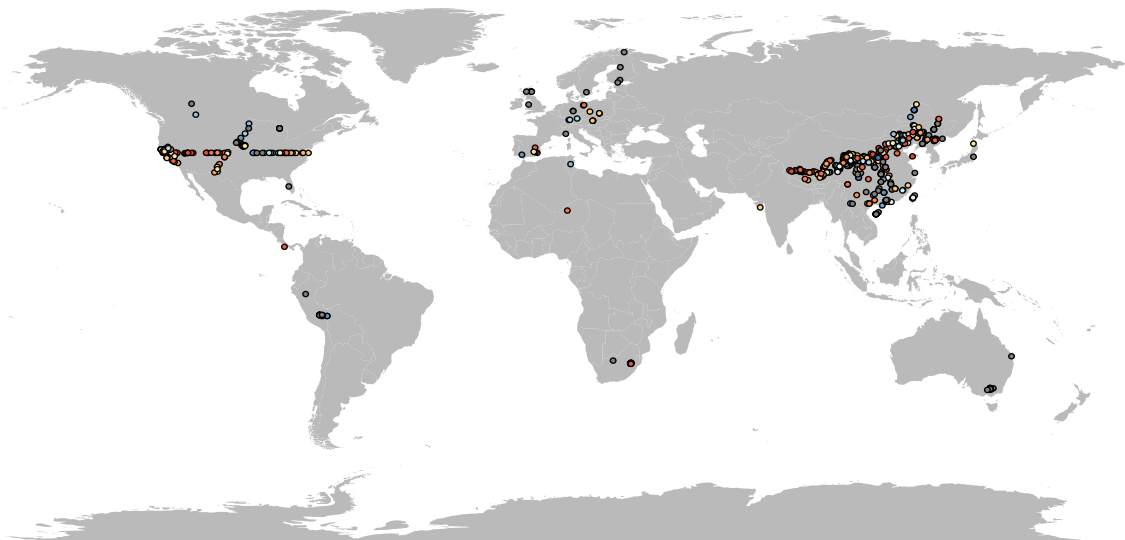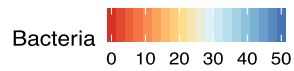

**Fig. S3 Map of sample locations for abundance of fungi and bacteria.** All data points ( $n = 2753$  for fungi and  $n = 2759$  for bacteria) falling within the same 30 arc-seconds ( $\sim 1\text{-km}^2$ ) pixel were aggregated via an average ( $n = 646$  and  $n = 647$  for both fungi and bacteria, respectively).



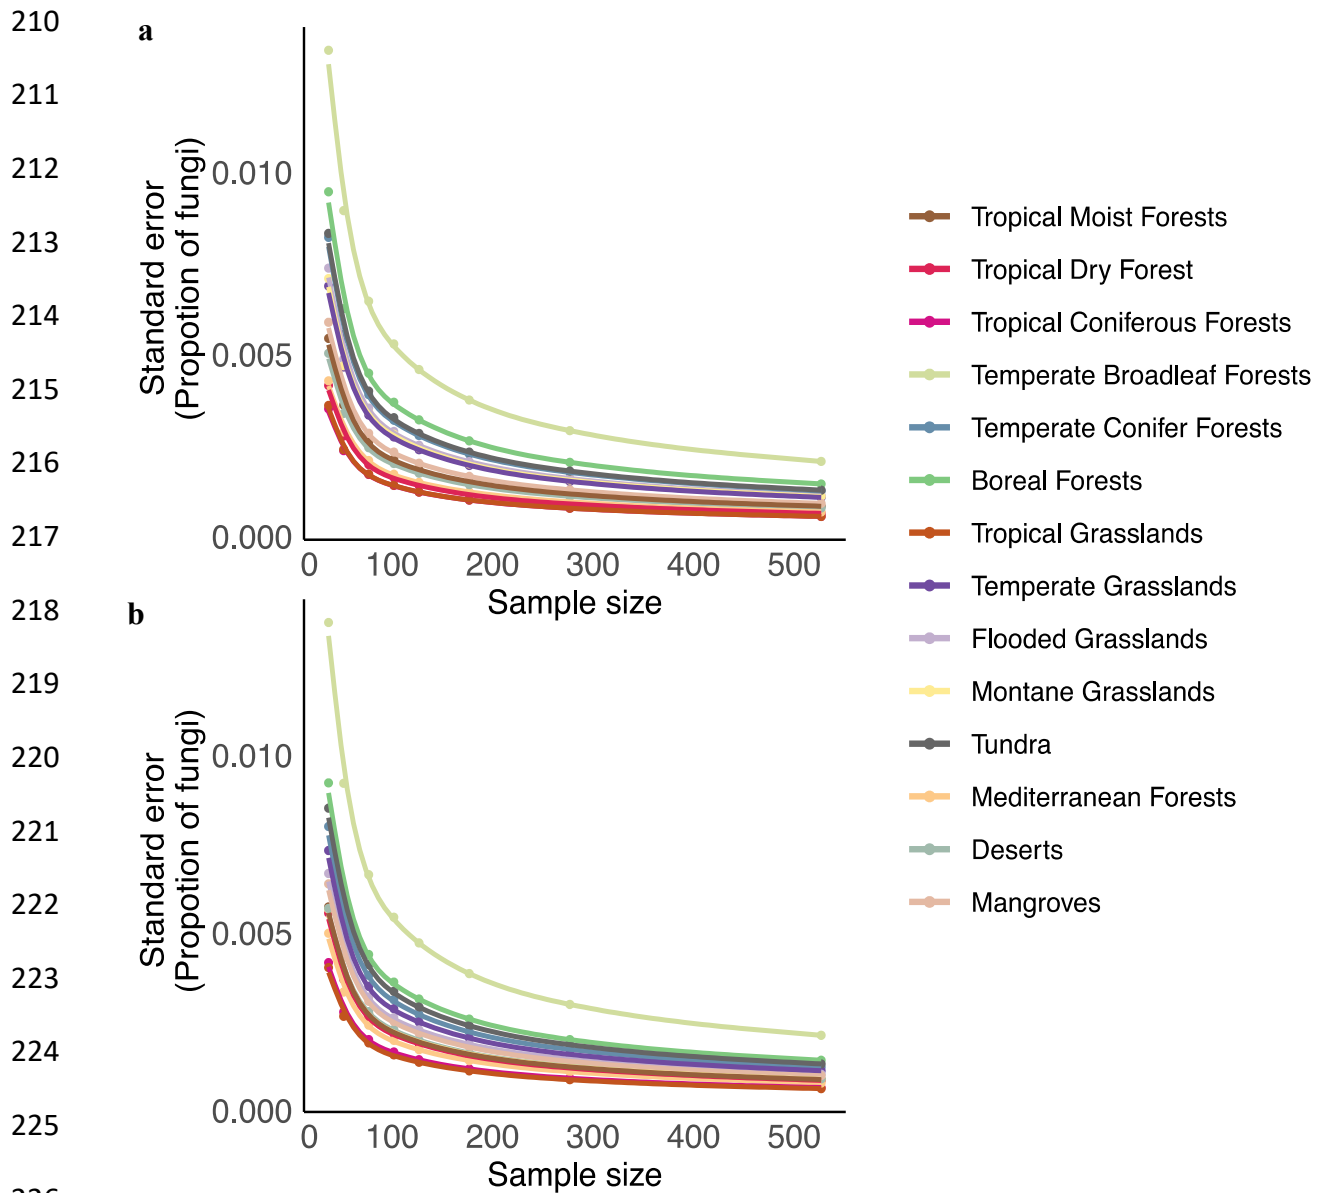

227 **Fig. S4** The standard error of the predicted mean values of fungal proportion decrease with  
 228 increasing sample size, quantified by the 1000 bootstrapping. a, the scenario of using full  
 229 dataset. b, the scenario of using dataset with natural ecosystems.

230  
 231  
 232  
 233  
 234

235  
236  
237  
238  
239  
240  
241  
242  
243  
244  
245  
246  
247  
248  
249  
250  
251  
252  
253  
254  
255  
256  
257  
258  
259

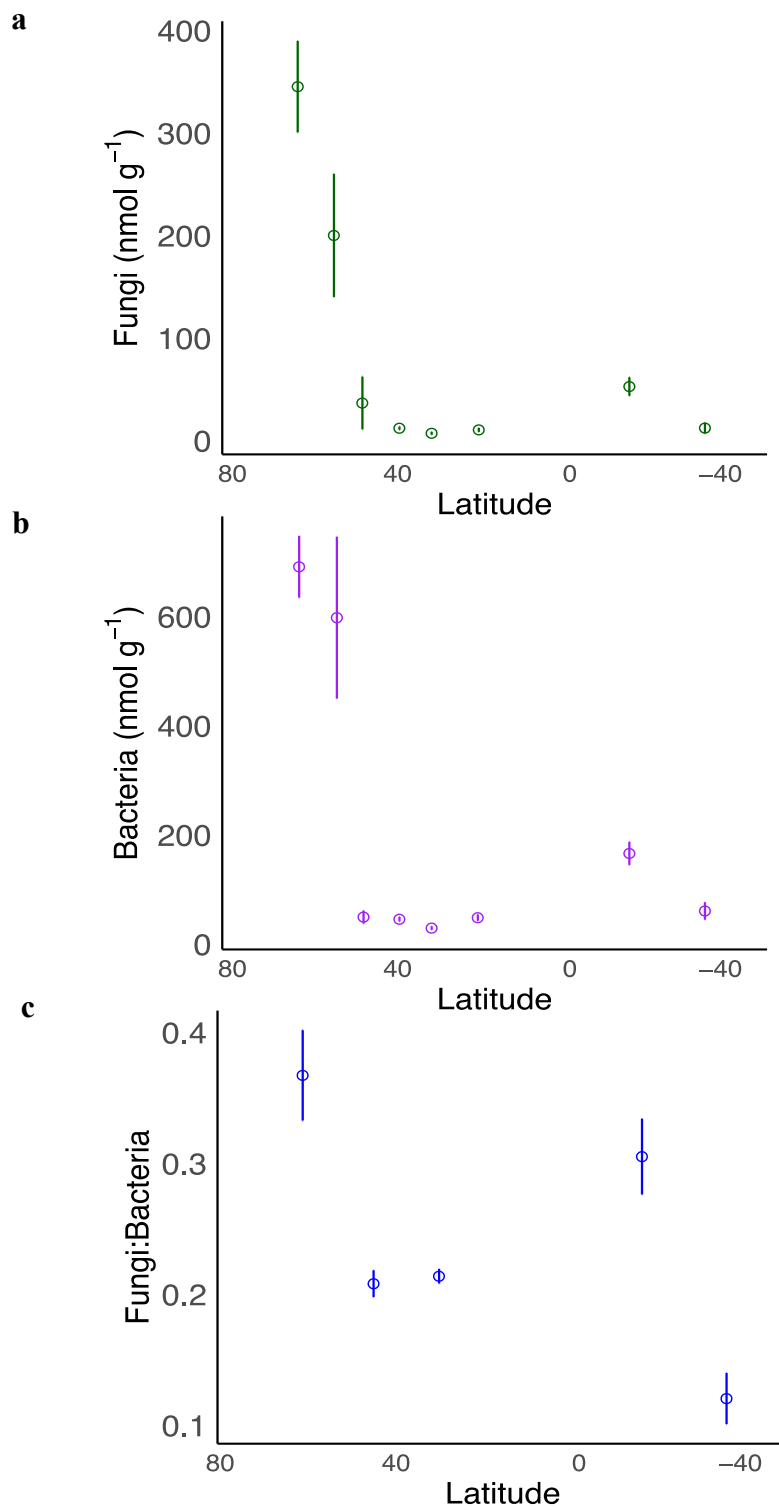

**Fig. S5 Abundance of fungi (a), bacteria (b), and fungi and bacteria ratio (c) derived from PLFA as affected by latitude.**

260  
 261  
 262  
 263  
 264  
 265  
 266  
 267  
 268  
 269  
 270  
 271  
 272  
 273  
 274  
 275  
 276  
 277  
 278  
 279  
 280  
 281  
 282  
 283  
 284

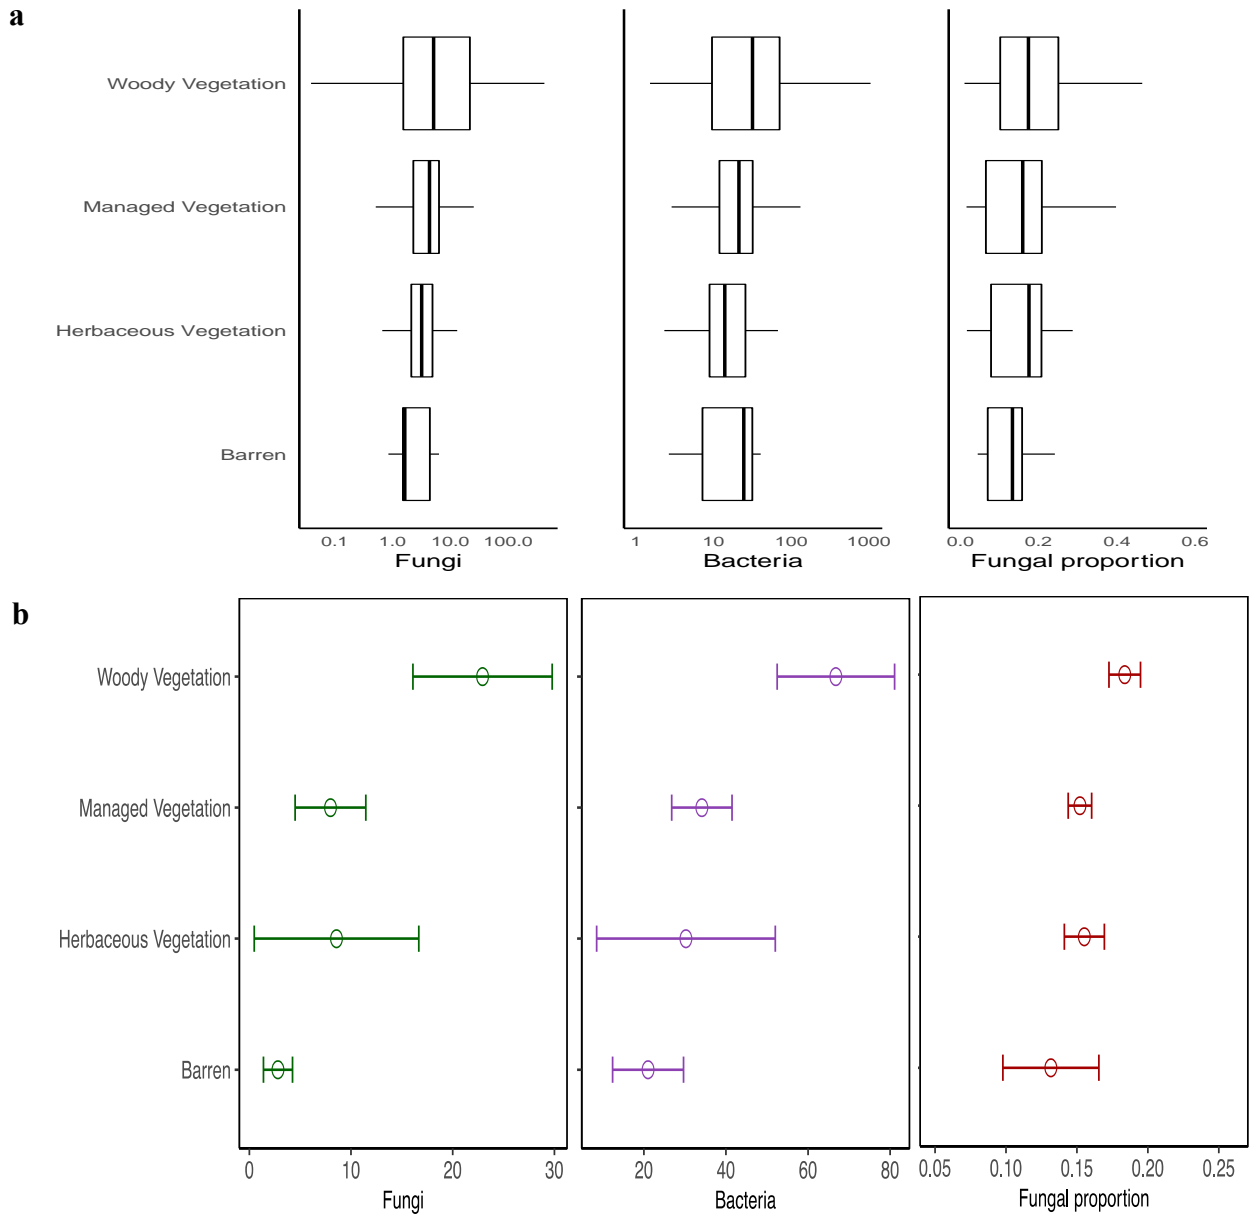

**Fig. S6 The median and interquartile range (a) and mean  $\pm$  95 CIs (b) of abundance of fungi and bacteria and fungal proportion across vegetation types. Mediterranean and desert have low sample sizes (<25) and thus were combined.**

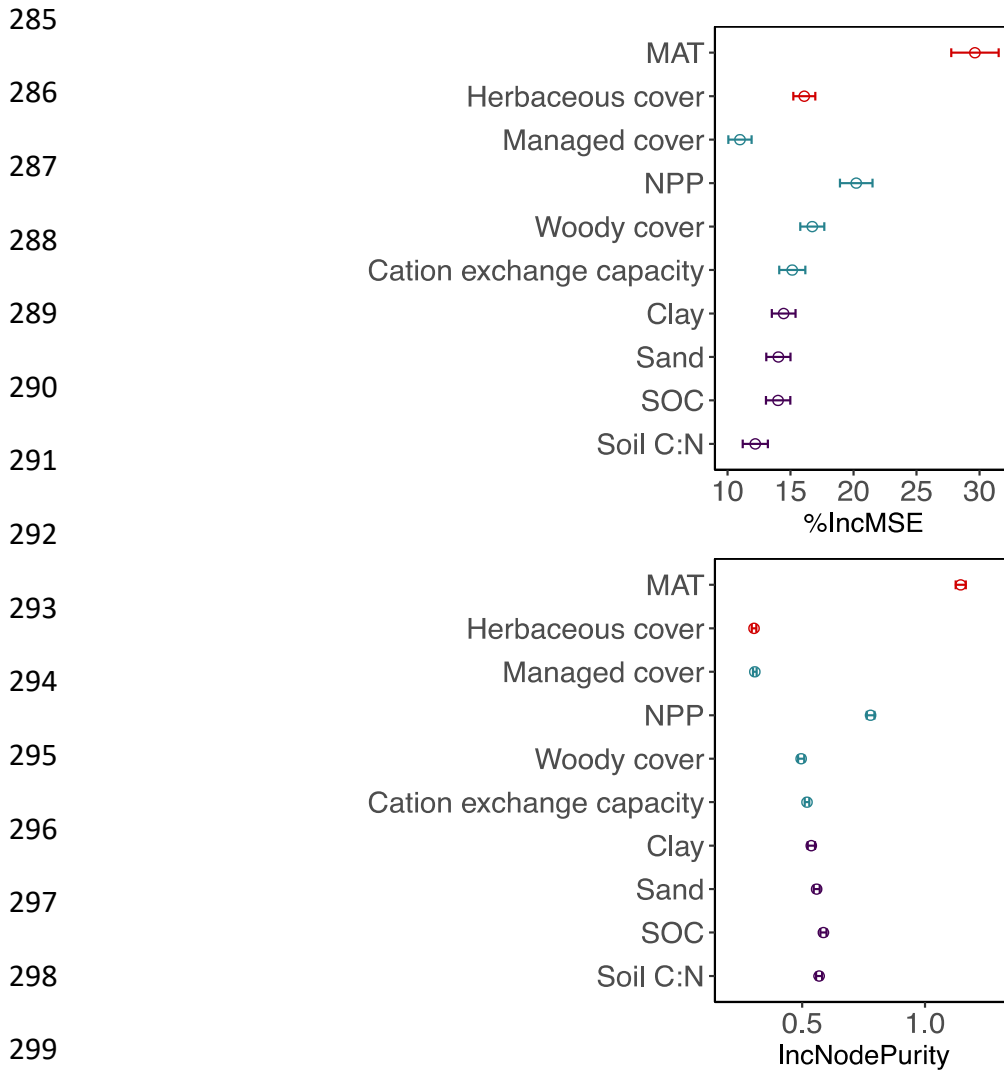

300 **Fig. S7 Mean decrease in accuracy (%IncMSE, mean and SD) and mean decrease gini**  
 301 **(IncNodePurity, mean and SD) estimated from 1000 simulations of random forests. This**  
 302 **is used to evaluate the importance of top environmental drivers on proportion of fungi derived**  
 303 **from natural ecosystems.**

310

**a**

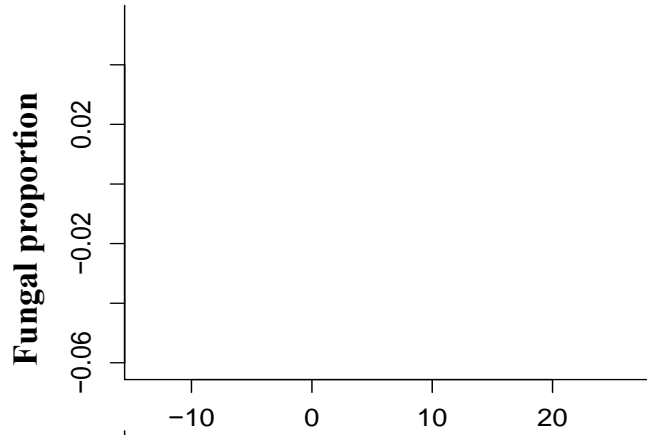

311

312

313

314

315

316

**b**

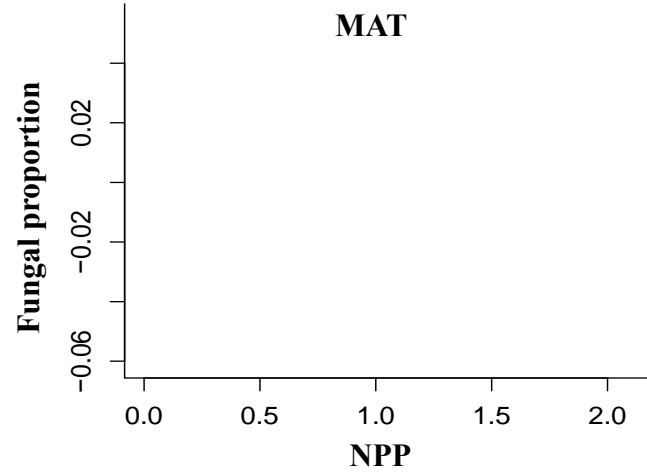

317

318

319

320

321

322

**c**

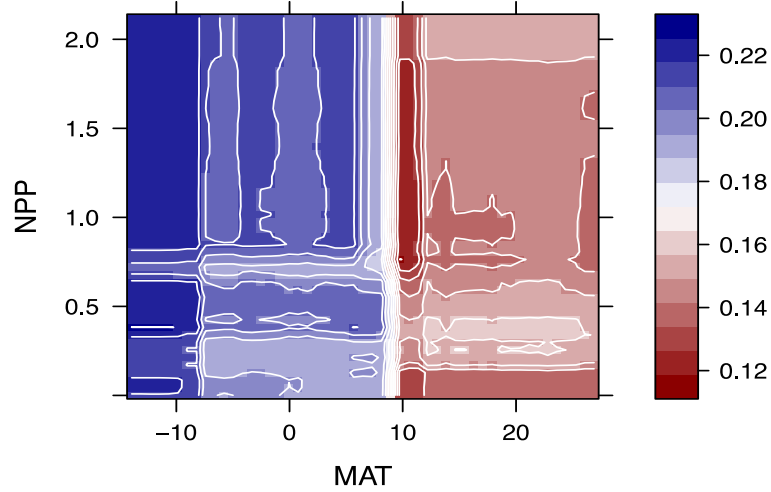

323

324

325

326

327

328

329

**Fig. S8 Fungal proportion is primarily associated with net primary productivity and climate using data set of natural ecosystems. a–b, Partial feature contributions of primary environmental variables (a, MAT; b, NPP) to proportion of fungi. c, Partial feature contributions of primary environmental variable interactions (MAT vs NPP) to proportion of fungi.**

335

336

337

338

339

340

341

342

343

344

345

346

347

348

349

350

351

352

353

354

355

356

357

358

359

360

361

362

363

364

365

366

367

368

369

370

371

372

373

374

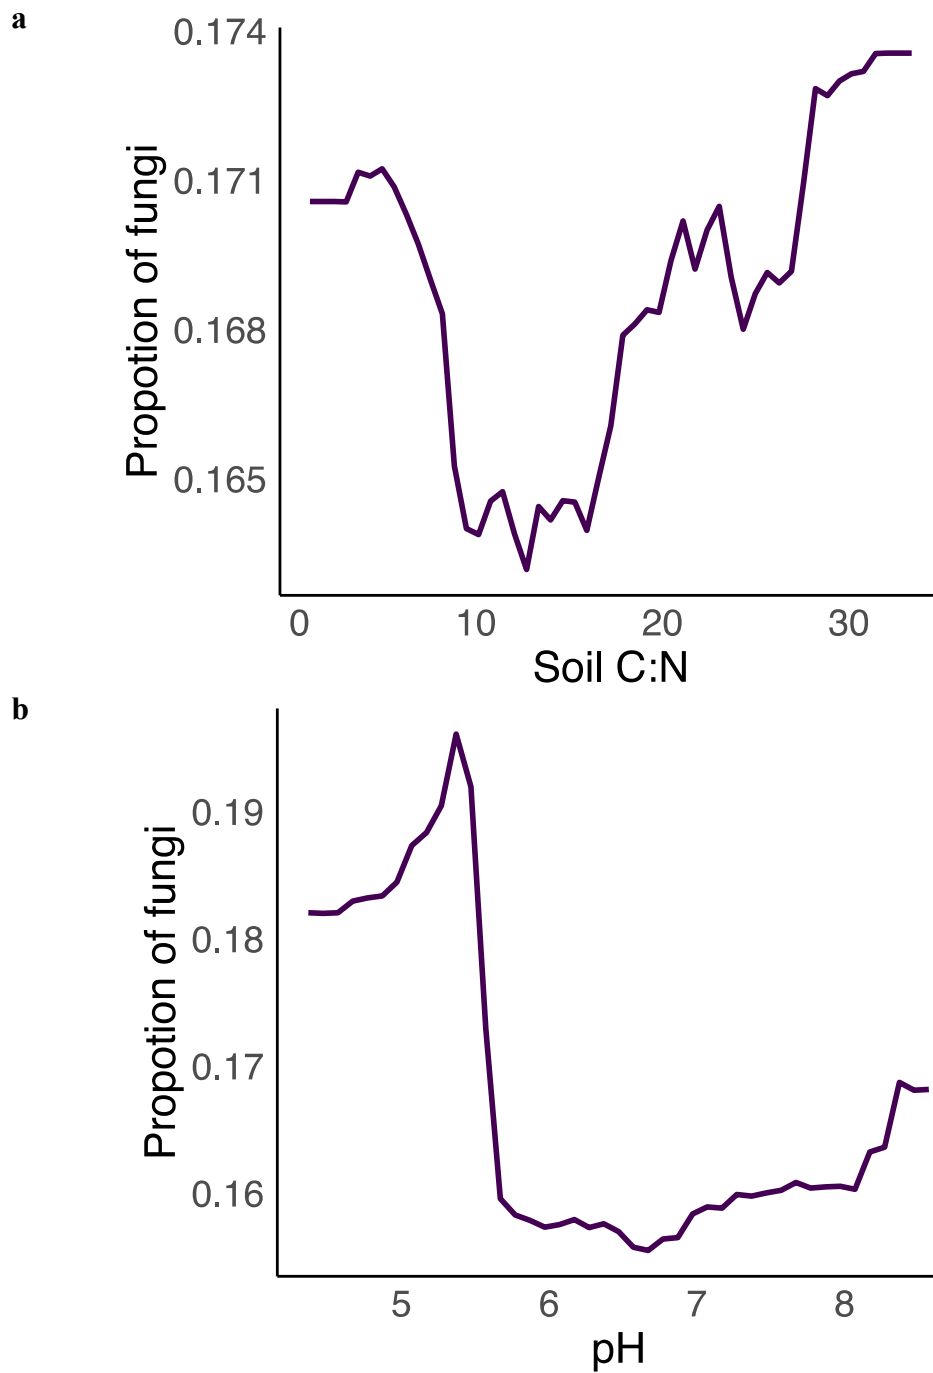

**Fig. S9 Partial feature contributions of soil C:N (a) and pH (b) to fungal proportion.**

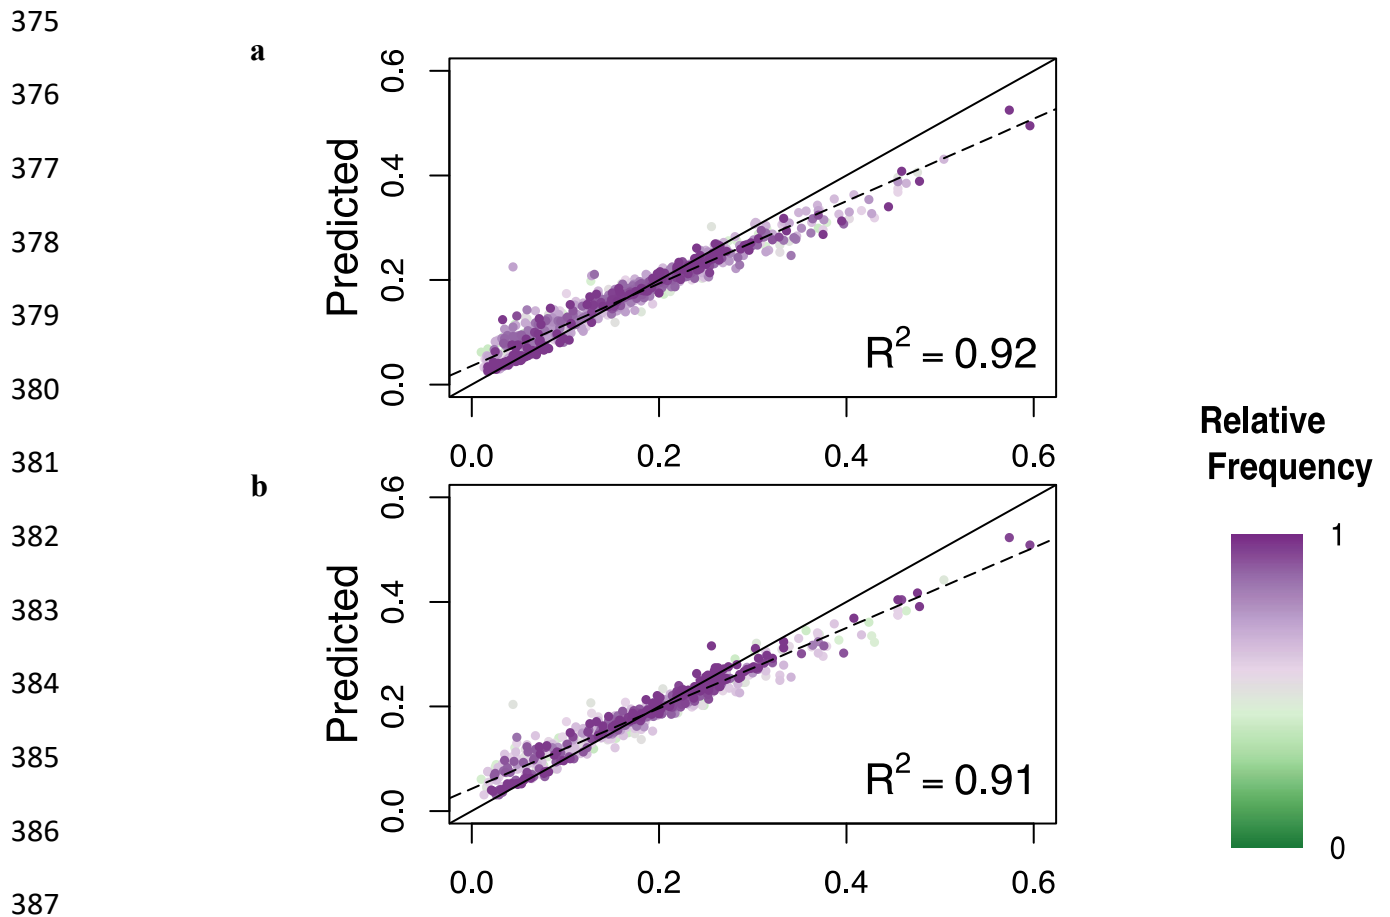

388 **Fig. S10 Model and data validation in the final model.** a, the scenario of using full dataset  
 389 for fungal proportion; b, the scenario of using dataset from natural ecosystems for fungal  
 390 proportion; C. Heat plots showing the relationships between predicted versus observed values  
 391 of fungal proportion for the best final models. Dashed diagonal lines indicate fitted  
 392 relationships, while solid diagonal lines indicate a 1:1 relationship between predicted and  
 393 observed points.

394

395

396

397

398

399

400  
401  
402  
403  
404  
405  
406  
407  
408  
409  
410  
411  
412  
413  
414  
415  
416  
417  
418  
419  
420  
421  
422  
423  
424

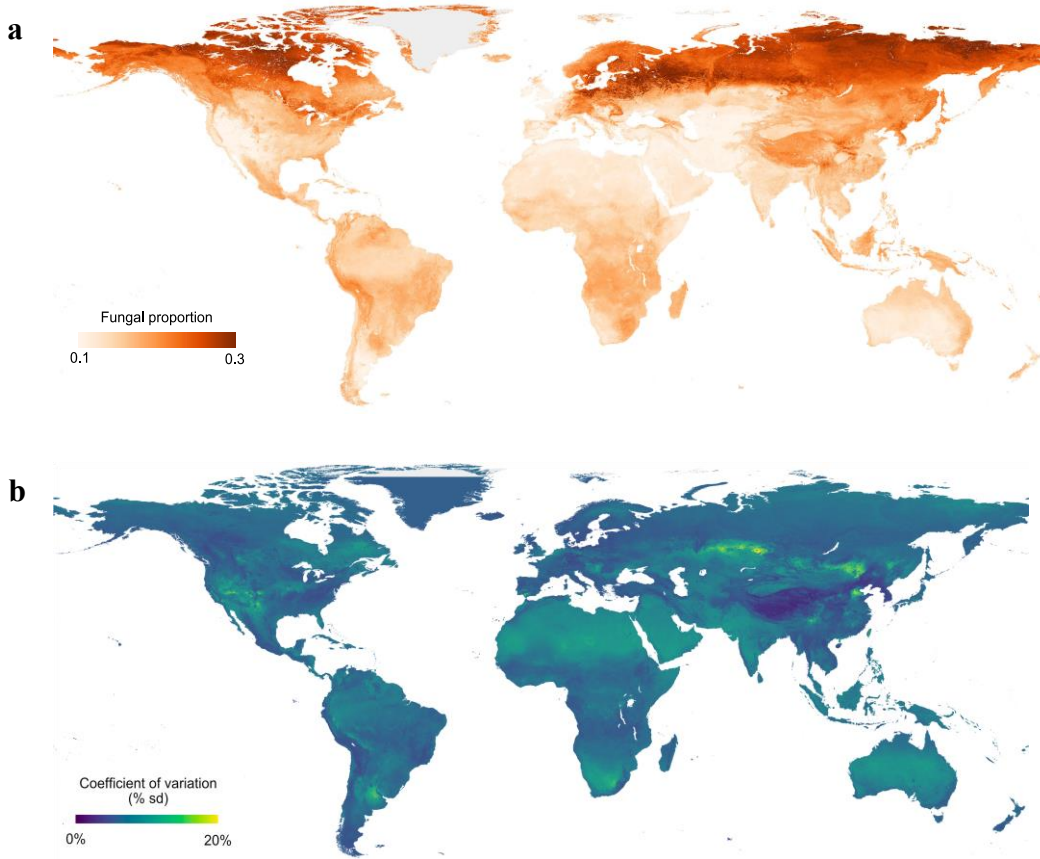

**Fig. S11 Global map of fungal proportion (a) and bootstrapped (100 iterations) coefficient of variation (b) at the 30 arcsec (approximately 1 km) pixel scale using the data with natural ecosystems.** Bootstrapped coefficient of variation is standard deviation divided by the mean predicted value as a measure of prediction accuracy. Sampling was stratified by biome.



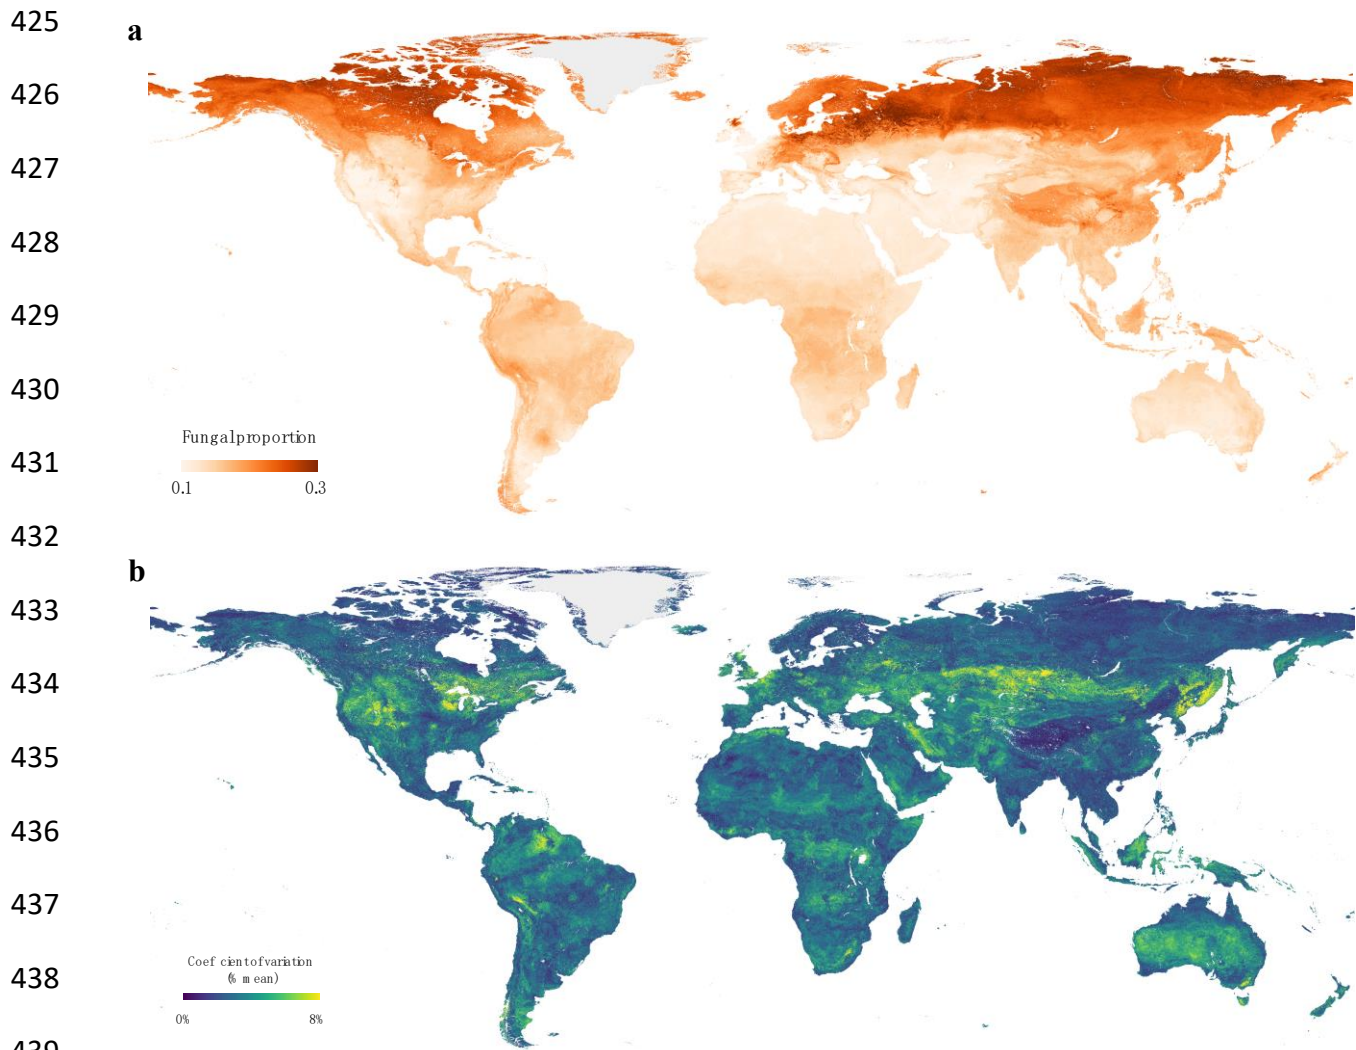

440

441 **Fig. S12 Global map of fungal proportion (a) and bootstrapped (100 iterations)**  
442 **coefficient of variation (b) at the 30 arcsec (approximately 1 km) pixel scale using full**  
443 **data.** Bootstrapped coefficient of variation is standard deviation divided by the mean  
444 predicted value as a measure of prediction accuracy. Samples were selected by randomly  
445 sampling 90% full datasets with replacement to account for the unbalanced sample  
446 distribution.

447

448

449

450 Supplementary references for PLFA

- 451 1. Schneckner, J. *et al.* Effects of soil organic matter properties and microbial community  
452 composition on enzyme activities in cryoturbated arctic soils. *PLoS One* (2014).  
453 doi:10.1371/journal.pone.0094076
- 454 2. Birkhofer, K. *et al.* General relationships between abiotic soil properties and soil biota  
455 across spatial scales and different land-use types. *PLoS One* (2012).  
456 doi:10.1371/journal.pone.0043292
- 457 3. Niu, J., Zhou, X., Jiang, N. & Wang, Y. Characteristics of soil microbial communities  
458 under dry and wet condition in Zoige alpine wetland. *Shengtai Xuebao/ Acta Ecol. Sin.*  
459 (2011).
- 460 4. de Vries, F. T. *et al.* Abiotic drivers and plant traits explain landscape-scale patterns in  
461 soil microbial communities. *Ecol. Lett.* **15**, 1230–1239 (2012).
- 462 5. Drenovsky, R. E., Steenwerth, K. L., Jackson, L. E. & Scow, K. M. Land use and  
463 climatic factors structure regional patterns in soil microbial communities. *Glob. Ecol.*  
464 *Biogeogr.* **19**, 27–39 (2010).
- 465 6. Bardgett, R. D., Lovell, R. D., Hobbs, P. J. & Jarvis, S. C. Seasonal changes in soil  
466 microbial communities along a fertility gradient of temperate grasslands. *Soil Biol.*  
467 *Biochem.* (1999). doi:10.1016/S0038-0717(99)00016-4
- 468 7. Boot, C. M., Hall, E. K., Deneff, K. & Baron, J. S. Long-term reactive nitrogen loading  
469 alters soil carbon and microbial community properties in a subalpine forest ecosystem.  
470 *Soil Biol. Biochem.* (2016). doi:10.1016/j.soilbio.2015.10.002
- 471 8. Boyle, S. A., Yarwood, R. R., Bottomley, P. J. & Myrold, D. D. Bacterial and fungal  
472 contributions to soil nitrogen cycling under Douglas fir and red alder at two sites in  
473 Oregon. *Soil Biol. Biochem.* (2008). doi:10.1016/j.soilbio.2007.09.007
- 474 9. Brant, J. B., Myrold, D. D. & Sulzman, E. W. Root controls on soil microbial

- 475 community structure in forest soils. *Oecologia* (2006). doi:10.1007/s00442-006-0402-7
- 476 10. Chang, E. H. & Chiu, C. Y. Changes in soil microbial community structure and activity  
477 in a cedar plantation invaded by moso bamboo. *Appl. Soil Ecol.* (2015).  
478 doi:10.1016/j.apsoil.2015.02.001
- 479 11. Chang, E. H., Tian, G. & Chiu, C. Y. The effect of re-planting trees on soil microbial  
480 communities in a wildfire-induced subalpine grassland. *Forests* (2017).  
481 doi:10.3390/f8100385
- 482 12. Chang, E. H., Chen, C. P., Tian, G. & Chiu, C. Y. Replacement of natural hardwood  
483 forest with planted bamboo and cedar in a humid subtropical mountain affects soil  
484 microbial community. *Appl. Soil Ecol.* (2018). doi:10.1016/j.apsoil.2017.11.006
- 485 13. Cui, H. jun *et al.* Soil microbial community composition and its driving factors in  
486 alpine grasslands along a mountain elevational gradient. *J. Mt. Sci.* (2016).  
487 doi:10.1007/s11629-015-3614-7
- 488 14. Dong, W. Y. *et al.* Responses of soil microbial communities and enzyme activities to  
489 nitrogen and phosphorus additions in Chinese fir plantations of subtropical China.  
490 *Biogeosciences* (2015). doi:10.5194/bg-12-5537-2015
- 491 15. He, R. *et al.* Effects of forest conversion on soil microbial communities depend on soil  
492 layer on the eastern Tibetan Plateau of China. *PLoS One* (2017).  
493 doi:10.1371/journal.pone.0186053
- 494 16. Guo, J. *et al.* Conversion of a natural evergreen broadleaved forest into coniferous  
495 plantations in a subtropical area: effects on composition of soil microbial communities  
496 and soil respiration. *Biol. Fertil. Soils* (2016). doi:10.1007/s00374-016-1120-x
- 497 17. Herold, N. *et al.* Soil property and management effects on grassland microbial  
498 communities across a latitudinal gradient in Germany. *Appl. Soil Ecol.* (2014).  
499 doi:10.1016/j.apsoil.2013.07.009

- 500 18. Hsiao, C. J., Sassenrath, G. F., Zeglin, L. H., Hettiarachchi, G. M. & Rice, C. W.  
501 Vertical changes of soil microbial properties in claypan soils. *Soil Biol. Biochem.*  
502 (2018). doi:10.1016/j.soilbio.2018.03.012
- 503 19. Huang, Y. M., Michel, K., An, S. shan & Zechmeister-Boltenstern, S. Changes in  
504 microbial-community structure with depth and time in a chronosequence of restored  
505 grassland soils on the Loess Plateau in northwest China. *J. Plant Nutr. Soil Sci.* (2011).  
506 doi:10.1002/jpln.201000397
- 507 20. KUMAR, C. M. & GHOSHAL, N. Impact of Land-Use Change on Soil Microbial  
508 Community Composition and Organic Carbon Content in the Dry Tropics. *Pedosphere*  
509 (2017). doi:10.1016/S1002-0160(17)60404-1
- 510 21. Labidi, S., Nasr, H., Zouaghi, M. & Wallander, H. Effects of compost addition on  
511 extra-radical growth of arbuscular mycorrhizal fungi in *Acacia tortilis* ssp. *raddiana*  
512 savanna in a pre-Saharan area. *Appl. Soil Ecol.* (2007).  
513 doi:10.1016/j.apsoil.2006.04.009
- 514 22. Li, H. *et al.* Shift in soil microbial communities with shrub encroachment in Inner  
515 Mongolia grasslands, China. *Eur. J. Soil Biol.* (2017). doi:10.1016/j.ejsobi.2017.02.004
- 516 23. Liu, L., Gundersen, P., Zhang, T. & Mo, J. Effects of phosphorus addition on soil  
517 microbial biomass and community composition in three forest types in tropical China.  
518 *Soil Biol. Biochem.* (2012). doi:10.1016/j.soilbio.2011.08.017
- 519 24. Ma, L., Guo, C., Xin, X., Yuan, S. & Wang, R. Effects of belowground litter addition,  
520 increased precipitation and clipping on soil carbon and nitrogen mineralization in a  
521 temperate steppe. *Biogeosciences* (2013). doi:10.5194/bg-10-7361-2013
- 522 25. Merilä, P. *et al.* Soil organic matter quality as a link between microbial community  
523 structure and vegetation composition along a successional gradient in a boreal forest.  
524 *Appl. Soil Ecol.* (2010). doi:10.1016/j.apsoil.2010.08.003

- 525 26. Monkai, J. *et al.* Natural forests maintain a greater soil microbial diversity than that in  
526 rubber plantations in Southwest China. *Agric. Ecosyst. Environ.* (2018).  
527 doi:10.1016/j.agee.2018.06.009
- 528 27. Schneckler, J. *et al.* Microbial community composition shapes enzyme patterns in  
529 topsoil and subsoil horizons along a latitudinal transect in Western Siberia. *Soil Biol.*  
530 *Biochem.* (2015). doi:10.1016/j.soilbio.2015.01.016
- 531 28. Smyth, C. E., Macey, D. & Trofymow, J. A. Long-term litter decay in Canadian forests  
532 and the influence of soil microbial community and soil chemistry. *Soil Biol. Biochem.*  
533 (2015). doi:10.1016/j.soilbio.2014.09.027
- 534 29. Sun, D. *et al.* Effects of experimental warming on soil microbial communities in two  
535 contrasting subalpine forest ecosystems, eastern Tibetan Plateau, China. *J. Mt. Sci.*  
536 (2016). doi:10.1007/s11629-015-3733-1
- 537 30. Teurlinx, S., Heijboer, A., Veraart, A. J., Kowalchuk, G. A. & Steven, S. A. Local  
538 functioning, landscape structuring: Drivers of soil microbial community structure and  
539 function in peatlands. *Front. Microbiol.* (2018). doi:10.3389/fmicb.2018.02060
- 540 31. Wang, M., Xue, J., Horswell, J., Kimberley, M. O. & Huang, Z. Long-term biosolids  
541 application alters the composition of soil microbial groups and nutrient status in a pine  
542 plantation. *Biol. Fertil. Soils* **53**, 799–809 (2017).
- 543 32. Wei, Y., Cao, W., Li, J., Zhang, A. & Li, X. Phospholipidfatty acid (PLFA) analysis of  
544 soil microbial community structure with different intensities of grazing and fencing in  
545 alpine shrubland. *Shengtai Xuebao/ Acta Ecol. Sin.* (2018).  
546 doi:10.5846/stxb201706301182
- 547 33. Whitaker, J. *et al.* Microbial community composition explains soil respiration  
548 responses to changing carbon inputs along an Andes-to-Amazon elevation gradient. *J.*  
549 *Ecol.* **102**, 1058–1071 (2014).

- 550 34. Xiao, L., Liu, G. Bin & Xue, S. Effects of vegetational type and soil depth on soil  
551 microbial communities on the Loess Plateau of China. *Arch. Agron. Soil Sci.* (2016).  
552 doi:10.1080/03650340.2016.1170811
- 553 35. Xu, G. *et al.* Labile, recalcitrant, microbial carbon and nitrogen and the microbial  
554 community composition at two *Abies faxoniana* forest elevations under elevated  
555 temperatures. *Soil Biol. Biochem.* (2015). doi:10.1016/j.soilbio.2015.08.016
- 556 36. Xu, Z. *et al.* The variations in soil microbial communities, enzyme activities and their  
557 relationships with soil organic matter decomposition along the northern slope of  
558 Changbai Mountain. *Appl. Soil Ecol.* (2014). doi:10.1016/j.apsoil.2014.09.015
- 559 37. Yang, Y., Geng, Y., Zhou, H., Zhao, G. & Wang, L. Effects of gaps in the forest  
560 canopy on soil microbial communities and enzyme activity in a Chinese pine forest.  
561 *Pedobiologia (Jena)*. (2017). doi:10.1016/j.pedobi.2017.03.001
- 562 38. Yokobe, T., Hyodo, F. & Tokuchi, N. Seasonal effects on microbial community  
563 structure and nitrogen dynamics in temperate forest soil. *Forests* (2018).  
564 doi:10.3390/f9030153
- 565 39. Zhang, X., Wang, W., Chen, W., Zhang, N. & Zeng, H. Comparison of seasonal soil  
566 microbial process in snow-covered temperate ecosystems of northern China. *PLoS One*  
567 (2014). doi:10.1371/journal.pone.0092985
- 568 40. Zhao, Q. *et al.* Altered precipitation seasonality impacts the dominant fungal but rare  
569 bacterial taxa in subtropical forest soils. *Biol. Fertil. Soils* (2017). doi:10.1007/s00374-  
570 016-1171-z
- 571 41. Zhou, Y., Clark, M., Su, J. & Xiao, C. Litter decomposition and soil microbial  
572 community composition in three Korean pine (*Pinus koraiensis*) forests along an  
573 altitudinal gradient. *Plant Soil* (2014). doi:10.1007/s11104-014-2254-y
- 574 42. Ananyeva, N. D., Castaldi, S., Stolnikova, E. V., Kudeyarov, V. N. & Valentini, R.

- 575 Fungi-to-bacteria ratio in soils of European Russia. *Arch. Agron. Soil Sci.* (2015).  
576 doi:10.1080/03650340.2014.940916
- 577 43. Chen, Y. L. *et al.* Patterns and drivers of soil microbial communities in Tibetan alpine  
578 and global terrestrial ecosystems. *J. Biogeogr.* (2016). doi:10.1111/jbi.12806
- 579 44. Bischoff, N. *et al.* Land-use change under different climatic conditions: Consequences  
580 for organic matter and microbial communities in Siberian steppe soils. *Agric. Ecosyst.*  
581 *Environ.* (2016). doi:10.1016/j.agee.2016.10.022
- 582 45. Chang, E. H., Chen, T. H., Tian, G. L., Hsu, C. K. & Chiu, C. Y. Effect of 40 and 80  
583 years of conifer regrowth on soil microbial activities and community structure in  
584 subtropical low mountain forests. *Forests* (2016). doi:10.3390/f7100244
- 585 46. Chang, E. H., Tian, G. & Chiu, C. Y. Soil microbial communities in natural and  
586 managed cloud montane forests. *Forests* (2017). doi:10.3390/f8010033
- 587 47. Chen, Y. *et al.* Large amounts of easily decomposable carbon stored in subtropical  
588 forest subsoil are associated with r-strategy-dominated soil microbes. *Soil Biol.*  
589 *Biochem.* (2016). doi:10.1016/j.soilbio.2016.01.004
- 590 48. Cheng, S., Fang, H. & Yu, G. Threshold responses of soil organic carbon concentration  
591 and composition to multi-level nitrogen addition in a temperate needle-broadleaved  
592 forest. *Biogeochemistry* (2018). doi:10.1007/s10533-017-0412-z
- 593 49. Demoling, F., Ola Nilsson, L. & Bååth, E. Bacterial and fungal response to nitrogen  
594 fertilization in three coniferous forest soils. *Soil Biol. Biochem.* (2008).  
595 doi:10.1016/j.soilbio.2007.08.019
- 596 50. Ebersberger, D., Wermbter, N., Niklaus, P. A. & Kandeler, E. Effects of long term  
597 CO<sub>2</sub> enrichment on microbial community structure in calcareous grassland. *Plant Soil*  
598 (2004). doi:10.1023/B:PLSO.0000047768.89268.8c
- 599 51. Grayston, S. J. & Rennenberg, H. Assessing effects of forest management on microbial

- 600 community structure in a central European beech forest. *Can. J. For. Res.* (2006).  
601 doi:10.1139/X06-154
- 602 52. Hoogmoed, M., Cunningham, S. C., Baker, P. J., Beringer, J. & Cavagnaro, T. R.  
603 Effects of wetting frequency and afforestation on carbon, nitrogen and the microbial  
604 community in soil. *Agric. Ecosyst. Environ.* (2016). doi:10.1016/j.agee.2016.06.024
- 605 53. Huang, X. *et al.* Changes of soil microbial biomass carbon and community  
606 composition through mixing nitrogen-fixing species with *Eucalyptus urophylla* in  
607 subtropical China. *Soil Biol. Biochem.* (2014). doi:10.1016/j.soilbio.2014.01.021
- 608 54. Huygens, D. *et al.* Microbial nitrogen dynamics in south central Chilean agricultural  
609 and forest ecosystems located on an Andisol. *Nutr. Cycl. Agroecosystems* (2011).  
610 doi:10.1007/s10705-010-9386-0
- 611 55. Jangid, K. *et al.* Land-use history has a stronger impact on soil microbial community  
612 composition than aboveground vegetation and soil properties. *Soil Biol. Biochem.* **43**,  
613 2184–2193 (2011).
- 614 56. Jangid, K. *et al.* Development of soil microbial communities during tallgrass prairie  
615 restoration. *Soil Biol. Biochem.* (2010). doi:10.1016/j.soilbio.2009.11.008
- 616 57. The Microbial Community of Three Mountains Pingding, Changbai and Saihanwula  
617 Based on the Analysis of Phospholipid Fatty Acids(PLFAs). *Ecology and*  
618 *Environmental Sciences* (2014).
- 619 58. Liu, L. *et al.* Interactive Effects of Nitrogen and Phosphorus on Soil Microbial  
620 Communities in a Tropical Forest. *PLoS One* (2013).  
621 doi:10.1371/journal.pone.0061188
- 622 59. Ma, Z., Zhang, M., Xiao, R., Cui, Y. & Yu, F. Changes in soil microbial biomass and  
623 community composition in coastal wetlands affected by restoration projects in a  
624 Chinese delta. *Geoderma* (2017). doi:10.1016/j.geoderma.2016.11.037



- 625 60. Richter, A., Schöning, I., Kahl, T., Bauhus, J. & Ruesch, L. Regional environmental  
626 conditions shape microbial community structure stronger than local forest management  
627 intensity. *For. Ecol. Manage.* (2018). doi:10.1016/j.foreco.2017.11.027
- 628 61. Romaniuk, R., Costantini, A., Giuffré, L. & Nannipieri, P. Catabolic response and  
629 phospholipid fatty acid profiles as microbial tools to assess soil functioning. *Soil Use*  
630 *Manag.* (2016). doi:10.1111/sum.12293
- 631 62. Royer-Tardif, S., Bradley, R. L. & Parsons, W. F. J. Evidence that plant diversity and  
632 site productivity confer stability to forest floor microbial biomass. *Soil Biol. Biochem.*  
633 (2010). doi:10.1016/j.soilbio.2010.01.018
- 634 63. Stevenson, B. A., Hunter, D. W. F. & Rhodes, P. L. Temporal and seasonal change in  
635 microbial community structure of an undisturbed, disturbed, and carbon-amended  
636 pasture soil. *Soil Biol. Biochem.* (2014). doi:10.1016/j.soilbio.2014.04.010
- 637 64. Wang, Q., He, T., Wang, S. & Liu, L. Carbon input manipulation affects soil  
638 respiration and microbial community composition in a subtropical coniferous forest.  
639 *Agric. For. Meteorol.* (2013). doi:10.1016/j.agrformet.2013.04.021
- 640 65. Wang, C. *et al.* Effects of long-term experimental warming on plant community  
641 properties and soil microbial community composition in an alpine meadow. *Isr. J.*  
642 *Ecol. Evol.* (2017). doi:10.1080/15659801.2017.1281201
- 643 66. Wang, R. *et al.* Sensitivities to nitrogen and water addition vary among microbial  
644 groups within soil aggregates in a semiarid grassland. *Biol. Fertil. Soils* (2017).  
645 doi:10.1007/s00374-016-1165-x
- 646 67. Xu, Z. *et al.* Divergence of dominant factors in soil microbial communities and  
647 functions in forest ecosystems along a climatic gradient. *Biogeosciences* (2018).  
648 doi:10.5194/bg-15-1217-2018
- 649 68. Yang, B., Pang, X., Hu, B., Bao, W. & Tian, G. Does thinning-induced gap size result

- 650 in altered soil microbial community in pine plantation in eastern Tibetan Plateau? *Ecol.*  
651 *Evol.* (2017). doi:10.1002/ece3.2714
- 652 69. Yang, S. *et al.* Variations in soil microbial community composition and enzymatic  
653 activities in response to increased N deposition and precipitation in Inner Mongolian  
654 grassland. *Appl. Soil Ecol.* (2017). doi:10.1016/j.apsoil.2017.06.041
- 655 70. Yang, F. *et al.* Spatial heterogeneity of microbial community and enzyme activities in a  
656 broad-leaved Korean pine mixed forest. *Eur. J. Soil Biol.* (2018).  
657 doi:10.1016/j.ejsobi.2018.07.001
- 658 71. Zhao, C. *et al.* Soil microbial community composition and respiration along an  
659 experimental precipitation gradient in a semiarid steppe. *Sci. Rep.* (2016).  
660 doi:10.1038/srep24317
- 661 72. Baer, S. G., Bach, E. M., Meyer, C. K., Du Preez, C. C. & Six, J. Belowground  
662 Ecosystem Recovery During Grassland Restoration: South African Highveld  
663 Compared to US Tallgrass Prairie. *Ecosystems* **18**, 390–403 (2015).
- 664 73. Liang, A. *et al.* Investigations of relationships among aggregate pore structure,  
665 microbial biomass, and soil organic carbon in a Mollisol using combined non-  
666 destructive measurements and phospholipid fatty acid analysis. *Soil Tillage Res.*  
667 (2019). doi:10.1016/j.still.2018.09.003
- 668 74. Kou, L. *et al.* Nitrogen additions inhibit nitrification in acidic soils in a subtropical pine  
669 plantation: effects of soil pH and compositional shifts in microbial groups. *J. For. Res.*  
670 (2019). doi:10.1007/s11676-018-0645-2
- 671 75. Li, Q. *et al.* Spatial variation in soil microbial community structure and its relation to  
672 plant distribution and local environments following afforestation in central China. *Soil*  
673 *Tillage Res.* (2019). doi:10.1016/j.still.2019.05.015
- 674 76. Zhou, J. *et al.* Nitrogen addition affects soil respiration primarily through changes in

- 675 microbial community structure and biomass in a subtropical natural forest. *Forests*  
676 (2019). doi:10.3390/f10050435
- 677 77. Chen, L. *et al.* Differential responses of net n mineralization and nitrification to  
678 throughfall reduction in a castanopsis hystrix plantation in southern china. *For.*  
679 *Ecosyst.* (2019). doi:10.1186/s40663-019-0174-2
- 680 78. Zhang, Q. *et al.* Nitrogen addition accelerates the nitrogen cycle in a young subtropical  
681 Cunninghamia lanceolata (Lamb.) plantation. *Ann. For. Sci.* (2019).  
682 doi:10.1007/s13595-019-0817-z
- 683 79. Liu, D., Huang, Y., Sun, H. & An, S. The restoration age of Robinia pseudoacacia  
684 plantation impacts soil microbial biomass and microbial community structure in the  
685 Loess Plateau. *Catena* (2018). doi:10.1016/j.catena.2018.02.001
- 686 80. Wei, K., Sun, T., Tian, J., Chen, Z. & Chen, L. Soil microbial biomass, phosphatase  
687 and their relationships with phosphorus turnover under mixed inorganic and organic  
688 nitrogen addition in a Larix gmelinii plantation. *For. Ecol. Manage.* (2018).  
689 doi:10.1016/j.foreco.2018.04.035
- 690 81. Yang, M., Yang, D. & Yu, X. Soil microbial communities and enzyme activities in sea-  
691 buckthorn (*Hippophae rhamnoides*) plantation at different ages. *PLoS One* (2018).  
692 doi:10.1371/journal.pone.0190959
- 693 82. Li, J. *et al.* Response of soil organic carbon fractions, microbial community  
694 composition and carbon mineralization to high-input fertilizer practices under an  
695 intensive agricultural system. *PLoS One* (2018). doi:10.1371/journal.pone.0195144
- 696 83. Kang, H. *et al.* Changes in soil microbial community structure and function after  
697 afforestation depend on species and age: Case study in a subtropical alluvial island. *Sci.*  
698 *Total Environ.* (2018). doi:10.1016/j.scitotenv.2017.12.180
- 699 84. Fan, Y. *et al.* Decreased soil organic P fraction associated with ectomycorrhizal fungal

- 700 activity to meet increased P demand under N application in a subtropical forest  
701 ecosystem. *Biol. Fertil. Soils* (2018). doi:10.1007/s00374-017-1251-8
- 702 85. Yu, X. *et al.* Effect of soil layer and plant-soil interaction on soil microbial diversity  
703 and function after canopy gap disturbance. *Forests* (2018). doi:10.3390/f9110680
- 704 86. Liu, D. *et al.* Dynamics of soil nitrogen fractions and their relationship with soil  
705 microbial communities in two forest species of northern China. *PLoS One* (2018).  
706 doi:10.1371/journal.pone.0196567
- 707 87. Li, D., Liu, J., Chen, H., Zheng, L. & Wang, K. Soil microbial community responses to  
708 forage grass cultivation in degraded karst soils, Southwest China. *L. Degrad. Dev.*  
709 (2018). doi:10.1002/ldr.3188
- 710 88. Liao, H., Zheng, C., Li, J. & Long, J. Dynamics of soil microbial recovery from  
711 cropland to orchard along a 20-year chronosequence in a degraded karst ecosystem.  
712 *Sci. Total Environ.* (2018). doi:10.1016/j.scitotenv.2018.05.246
- 713 89. Zhao, Q. *et al.* Spring drying and intensified summer rainfall affected soil microbial  
714 community composition but not enzyme activity in a subtropical forest. *Appl. Soil*  
715 *Ecol.* (2018). doi:10.1016/j.apsoil.2018.06.014
- 716 90. Kim, S. *et al.* Tree species and recovery time drives soil restoration after mining: A  
717 chronosequence study. *L. Degrad. Dev.* (2018). doi:10.1002/ldr.2951
- 718 91. van Leeuwen, J. P. *et al.* Effects of land use on soil microbial biomass, activity and  
719 community structure at different soil depths in the Danube floodplain. *Eur. J. Soil Biol.*  
720 (2017). doi:10.1016/j.ejsobi.2017.02.001
- 721 92. Gunina, A., Smith, A. R., Godbold, D. L., Jones, D. L. & Kuzyakov, Y. Response of  
722 soil microbial community to afforestation with pure and mixed species. *Plant Soil*  
723 (2017). doi:10.1007/s11104-016-3073-0
- 724 93. Liu, Z., Rong, Q., Zhou, W. & Liang, G. Effects of inorganic and organic amendment

- 725 on soil chemical properties, enzyme activities, microbial community and soil quality in  
726 yellow clayey soil. *PLoS One* (2017). doi:10.1371/journal.pone.0172767
- 727 94. Fang, X. *et al.* Forest-type shift and subsequent intensive management affected soil  
728 organic carbon and microbial community in southeastern China. *Eur. J. For. Res.*  
729 (2017). doi:10.1007/s10342-017-1065-0
- 730 95. Lupwayi, N. Z., Larney, F. J., Blackshaw, R. E., Kanashiro, D. A. & Pearson, D. C.  
731 Phospholipid fatty acid biomarkers show positive soil microbial community responses  
732 to conservation soil management of irrigated crop rotations. *Soil Tillage Res.* (2017).  
733 doi:10.1016/j.still.2016.12.003
- 734 96. Dai, X., Wang, H. & Fu, X. Soil microbial community composition and its role in  
735 carbon mineralization in long-term fertilization paddy soils. *Sci. Total Environ.* (2017).  
736 doi:10.1016/j.scitotenv.2016.11.212
- 737 97. Rathore, A. P., Chaudhary, D. R. & Jha, B. Seasonal Patterns of Microbial Community  
738 Structure and Enzyme Activities in Coastal Saline Soils of Perennial Halophytes. *L.*  
739 *Degrad. Dev.* (2017). doi:10.1002/ldr.2710
- 740 98. Wang, C. *et al.* The effect of simulated warming on root dynamics and soil microbial  
741 community in an alpine meadow of the Qinghai-Tibet Plateau. *Appl. Soil Ecol.* (2017).  
742 doi:10.1016/j.apsoil.2017.03.005
- 743 99. Zhao, Q. *et al.* Asymmetric effects of litter removal and litter addition on the structure  
744 and function of soil microbial communities in a managed pine forest. *Plant Soil* (2017).  
745 doi:10.1007/s11104-016-3115-7
- 746 100. Sun, S. *et al.* Response of soil microbial community structure to increased precipitation  
747 and nitrogen addition in a semiarid meadow steppe. *Eur. J. Soil Sci.* (2017).  
748 doi:10.1111/ejss.12441
- 749 101. Kotzé, E., Sandhage-Hofmann, A., Amelung, W., Oomen, R. J. & du Preez, C. C. Soil

- 750 microbial communities in different rangeland management systems of a sandy savanna  
751 and clayey grassland ecosystem, South Africa. *Nutr. Cycl. Agroecosystems* (2017).  
752 doi:10.1007/s10705-017-9832-3
- 753 102. Swarzenski, C. M., Song, C., Meng, H., Wang, X. & Tan, W. Nitrogen additions affect  
754 litter quality and soil biochemical properties in a peatland of Northeast China. *Ecol.*  
755 *Eng.* (2017). doi:10.1016/j.ecoleng.2016.12.025
- 756 103. Zhang, J., Li, M. & Zheng, G. Effect of stand age on soil microbial community  
757 structure in wolfberry (*Lycium barbarum* L.) fields. *Shengtai Xuebao/Acta Ecol. Sin.*  
758 (2017). doi:10.1016/j.chnaes.2016.12.003
- 759 104. Xu, S. *et al.* Comparison of Microbial Community Composition and Diversity in  
760 Native Coastal Wetlands and Wetlands that Have Undergone Long-Term Agricultural  
761 Reclamation. *Wetlands* (2017). doi:10.1007/s13157-016-0843-7
- 762 105. Xiang, Y., Cheng, M., Huang, Y., An, S. & Darboux, F. Changes in soil microbial  
763 community and its effect on carbon sequestration following afforestation on the Loess  
764 Plateau, China. *Int. J. Environ. Res. Public Health* (2017). doi:10.3390/ijerph14080948
- 765 106. Veen, G. F. C. *et al.* Coordinated responses of soil communities to elevation in three  
766 subarctic vegetation types. *Oikos* (2017). doi:10.1111/oik.04158
- 767 107. Faust, S. *et al.* Effect of biodynamic soil amendments on microbial communities in  
768 comparison with inorganic fertilization. *Appl. Soil Ecol.* (2017).  
769 doi:10.1016/j.apsoil.2017.03.006
- 770 108. Qi, L. & Yang, J. Microbial community composition regulates SOC decomposition  
771 response to forest conversion in a Chinese temperate forest. *Ecol. Res.* (2017).  
772 doi:10.1007/s11284-016-1428-x
- 773 109. Chang, E. H., Chen, T. H., Tian, G. & Chiu, C. Y. The effect of altitudinal gradient on  
774 soil microbial community activity and structure in moso bamboo plantations. *Appl. Soil*

- 775 *Ecol.* (2016). doi:10.1016/j.apsoil.2015.10.018
- 776 110. Cavagnaro, T. R., Cunningham, S. C. & Fitzpatrick, S. Pastures to woodlands: Changes  
777 in soil microbial communities and carbon following reforestation. *Appl. Soil Ecol.* **107**,  
778 24–32 (2016).
- 779 111. Guo, X. *et al.* Effects of land use change on the composition of soil microbial  
780 communities in a managed subtropical forest. *For. Ecol. Manage.* (2016).  
781 doi:10.1016/j.foreco.2016.03.048
- 782 112. Jia, S. *et al.* Long-term conservation tillage influences the soil microbial community  
783 and its contribution to soil CO<sub>2</sub> emissions in a Mollisol in Northeast China. *J. Soils*  
784 *Sediments* (2016). doi:10.1007/s11368-015-1158-7
- 785 113. Xiao, L., Liu, G. Bin, Zhang, J. Y. & Xue, S. Long-term effects of vegetational  
786 restoration on soil microbial communities on the Loess Plateau of China. *Restor. Ecol.*  
787 (2016). doi:10.1111/rec.12374
- 788 114. Perkiömäki, J. & Fritze, H. Short and long-term effects of wood ash on the boreal  
789 forest humus microbial community. *Soil Biol. Biochem.* (2002). doi:10.1016/S0038-  
790 0717(02)00079-2
- 791 115. Perkiömäki, J., Tom-Petersen, A., Nybroe, O. & Fritze, H. Boreal forest microbial  
792 community after long-term field exposure to acid and metal pollution and its potential  
793 remediation by using wood ash. *Soil Biol. Biochem.* (2003). doi:10.1016/S0038-  
794 0717(03)00250-5
- 795 116. Niwa, S., Kaneko, N., Okada, H. & Sakamoto, K. Effects of fine-scale simulation of  
796 deer browsing on soil micro-foodweb structure and N mineralization rate in a  
797 temperate forest. *Soil Biol. Biochem.* (2008). doi:10.1016/j.soilbio.2007.10.004
- 798 117. Campbell, C. D., Cameron, C. M., Bastias, B. A., Chen, C. & Cairney, J. W. G. Long  
799 term repeated burning in a wet sclerophyll forest reduces fungal and bacterial biomass

- 800 and responses to carbon substrates. *Soil Biol. Biochem.* (2008).  
801 doi:10.1016/j.soilbio.2008.04.020
- 802 118. Unger, I. M., Kennedy, A. C. & Muzika, R. M. Flooding effects on soil microbial  
803 communities. *Appl. Soil Ecol.* (2009). doi:10.1016/j.apsoil.2009.01.007
- 804 119. Zhang, Q. *et al.* Alterations in soil microbial community composition and biomass  
805 following agricultural land use change. *Sci. Rep.* (2016). doi:10.1038/srep36587
- 806 120. Deng, Q. *et al.* Soil microbial community and its interaction with soil carbon and  
807 nitrogen dynamics following afforestation in central China. *Sci. Total Environ.* (2016).  
808 doi:10.1016/j.scitotenv.2015.09.080
- 809 121. Wang, C. *et al.* Responses of soil microbial community to continuous experimental  
810 nitrogen additions for 13 years in a nitrogen-rich tropical forest. *Soil Biol. Biochem.*  
811 (2018). doi:10.1016/j.soilbio.2018.03.009
- 812 122. Zheng, S. *et al.* Effect of nitrogen and acid deposition on soil respiration in a temperate  
813 forest in China. *Geoderma* (2018). doi:10.1016/j.geoderma.2018.05.022
- 814 123. Wang, J. *et al.* Conversion of rainforest into agroforestry and monoculture plantation in  
815 China: Consequences for soil phosphorus forms and microbial community. *Sci. Total*  
816 *Environ.* (2017). doi:10.1016/j.scitotenv.2017.04.012
- 817 124. Bastida, F. *et al.* Differential sensitivity of total and active soil microbial communities  
818 to drought and forest management. *Glob. Chang. Biol.* (2017). doi:10.1111/gcb.13790
- 819 125. Buyer, J. S., Baligar, V. C., He, Z. & Arévalo-Gardini, E. Soil microbial communities  
820 under cacao agroforestry and cover crop systems in Peru. *Appl. Soil Ecol.* (2017).  
821 doi:10.1016/j.apsoil.2017.09.009
- 822 126. Borymski, S., Cycon, M., Beckmann, M., Mur, L. A. J. & Piotrowska-Seget, Z. Plant  
823 species and heavy metals affect biodiversity of microbial communities associated with  
824 metal-tolerant plants in metalliferous soils. *Front. Microbiol.* (2018).



- 825 doi:10.3389/fmicb.2018.01425
- 826 127. Montiel-Rozas, M. M. *et al.* Long-term effects of organic amendments on bacterial and  
827 fungal communities in a degraded Mediterranean soil. *Geoderma* (2018).  
828 doi:10.1016/j.geoderma.2018.06.022
- 829 128. Huang, J. *et al.* Effects of phosphorus addition on soil microbial biomass and  
830 community composition in a subalpine spruce plantation. *Eur. J. Soil Biol.* (2016).  
831 doi:10.1016/j.ejsobi.2015.12.007
- 832 129. Chen, L. *et al.* Regulation of priming effect by soil organic matter stability over a broad  
833 geographic scale. *Nat. Commun.* (2019). doi:10.1038/s41467-019-13119-z
- 834 130. Zhang, C. *et al.* Soil microbial communities response to herbicide 2,4-  
835 dichlorophenoxyacetic acid butyl ester. *Eur. J. Soil Biol.* (2010).  
836 doi:10.1016/j.ejsobi.2009.12.005
- 837 131. Bezemer, T. M. *et al.* Plant species and functional group effects on abiotic and  
838 microbial soil properties and plant-soil feedback responses in two grasslands. *J. Ecol.*  
839 (2006). doi:10.1111/j.1365-2745.2006.01158.x
- 840 132. Bi, J., Zhang, N., Liang, Y., Yang, H. & Ma, K. Interactive effects of water and  
841 nitrogen addition on soil microbial communities in a semiarid steppe. *J. Plant Ecol.*  
842 (2012). doi:10.1093/jpe/rtr046
- 843 133. Chen, D. *et al.* Effects of plant functional group loss on soil biota and net ecosystem  
844 exchange: A plant removal experiment in the Mongolian grassland. *J. Ecol.* (2016).  
845 doi:10.1111/1365-2745.12541
- 846 134. Högberg, M. N., Högberg, P. & Myrold, D. D. Is microbial community composition in  
847 boreal forest soils determined by pH, C-to-N ratio, the trees, or all three? *Oecologia*  
848 (2007). doi:10.1007/s00442-006-0562-5
- 849 135. Niu, L., Liu, Y. H., Li, Y. & Ouyang, S. N. Microbial community structure of the

- 850 alpine meadow under different grazing styles in Naqu prefecture of Tibet. *Chinese J.*  
851 *Appl. Ecol.* (2015).
- 852 136. Qin, H. *et al.* Rapid soil fungal community response to intensive management in a  
853 bamboo forest developed from rice paddies. *Soil Biol. Biochem.* (2014).  
854 doi:10.1016/j.soilbio.2013.09.031
- 855 137. Yan, H., Huang, Y., Jiang, Y. & Zhao, T. Seasonal variation of PLFA during soil  
856 mineralization under two kinds of shrub lands in mountainous area of southern  
857 Ningxia, Northwest China. *Huanjing Kexue Xuebao/Acta Sci. Circumstantiae* (2014).  
858 doi:10.13671/j.hjkxxb.2014.0538
- 859 138. Yang, Q. *et al.* Structure and function of soil microbial community in artificially  
860 planted *Sonneratia apetala* and *S. caseolaris* forests at different stand ages in Shenzhen  
861 Bay, China. *Mar. Pollut. Bull.* (2014). doi:10.1016/j.marpolbul.2014.02.024
- 862 139. Hu, Y. *et al.* Soil organic carbon and soil structure are driving microbial abundance and  
863 community composition across the arid and semi-arid grasslands in northern China.  
864 *Soil Biol. Biochem.* (2014). doi:10.1016/j.soilbio.2014.06.014
- 865 140. Ma, L., Guo, C., Lü, X., Yuan, S. & Wang, R. Do climate factors govern soil microbial  
866 community composition and biomass at a regional scale? *Biogeosciences Discussions*  
867 (2014). doi:10.5194/bgd-11-17729-2014
- 868 141. Frey, B., Stemmer, M., Widmer, F., Luster, J. & Sperisen, C. Microbial activity and  
869 community structure of a soil after heavy metal contamination in a model forest  
870 ecosystem. *Soil Biol. Biochem.* (2006). doi:10.1016/j.soilbio.2005.11.032
- 871 142. Jiang, Y., Sun, B., Jin, C. & Wang, F. Soil aggregate stratification of nematodes and  
872 microbial communities affects the metabolic quotient in an acid soil. *Soil Biol.*  
873 *Biochem.* (2013). doi:10.1016/j.soilbio.2013.01.006
- 874 143. Jøner, E. J., Eldhuset, T. D., Lange, H. & Frostegård, Å. Changes in the microbial

- 875 community in a forest soil amended with aluminium in situ. in *Plant and Soil* (2005).  
876 doi:10.1007/s11104-005-2287-3
- 877 144. Li, Q. *et al.* Nitrogen Addition and Warming Independently Influence the Belowground  
878 Micro-Food Web in a Temperate Steppe. *PLoS One* (2013).  
879 doi:10.1371/journal.pone.0060441
- 880 145. Mitchell, R. J., Campbell, C. D., Chapman, S. J. & Cameron, C. M. The ecological  
881 engineering impact of a single tree species on the soil microbial community. *J. Ecol.*  
882 (2010). doi:10.1111/j.1365-2745.2009.01601.x
- 883 146. Potthoff, M. *et al.* Soil microbial community composition as affected by restoration  
884 practices in California grassland. *Soil Biol. Biochem.* (2006).  
885 doi:10.1016/j.soilbio.2005.12.009
- 886 147. Shanmugam, S. G. & Kingery, W. L. Changes in soil microbial community structure in  
887 relation to plant succession and soil properties during 4000 years of pedogenesis. *Eur.*  
888 *J. Soil Biol.* (2018). doi:10.1016/j.ejsobi.2018.07.003
- 889 148. Xu, M. *et al.* Soil microbial community structure and activity along a montane  
890 elevational gradient on the Tibetan Plateau. *Eur. J. Soil Biol.* (2014).  
891 doi:10.1016/j.ejsobi.2014.06.002
- 892 149. Waldrop, M. P. *et al.* The interacting roles of climate, soils, and plant production on  
893 soil microbial communities at a continental scale. *Ecology* (2017).  
894 doi:10.1002/ecy.1883
- 895 150. Ma, et al. Plants regulate the effects of experimental warming on the soil microbial  
896 community in an alpine scrub ecosystem. *PLoS One*, 13, e0195079 (2018).  
897
- 898 151. Xu. Influence of elevation and land use on soil organic carbon and microbial  
899 community on Southeast Tibetan Plateau. PhD Dissertation, China Agricultural

- 900 University, (2016).
- 901
- 902 152. Zhu. Study on the effects of microorganisms on phosphorus transformation in the  
903 rhizosphere of wetland plants. Masters Dissertation, Beijing Forestry University,  
904 (2016).
- 905 153. Zhao, et al. Changes in soil microbial community, enzyme activities and organic matter  
906 fractions under long-term straw return in north-central China. *Agriculture, Ecosystems  
907 & Environment*, 216, 82-88 (2016).
- 908 154. Wu, et al. The Effect of Forest Thinning on Soil Microbial Community Structure and  
909 Function. *Forests*, 10, 352 (2019).
- 910 155. Si, et al. Changes in soil microbial community composition and organic carbon  
911 fractions in an integrated ricecrayfish farming system in subtropical China. *Scientific  
912 Reports*, 7, 2856 (2017).
- 913 156. Peltoniemi, et al. Microbial ecology in a future climate: effects of temperature and  
914 moisture on microbial communities of two boreal fens. *Fems Microbiology Ecology*, 7,  
915 54-61 (2015).
- 916 157. Jing. The spatial heterogeneity of soil microorganism and organic matter in broad-  
917 leaved korean pine forest in Changbai mountain. Masters Dissertation, Shanxi  
918 University, (2016).
- 919 158. Huang, et al. Effects of phosphorus addition on soil microbial biomass and community  
920 composition in a subalpine spruce plantation. *European Journal of Soil Biology*, 72,  
921 35-41 (2016).
- 922 159. Yu, et al. Effect of monospecific and mixed seabuckthorn (*Hippophae rhamnoides*)  
923 plantations on the structure and activity of soil microbial communities. *PLoS One*,  
924 10, e0117505 (2015).

- 925
- 926 160. Zhang Responses of soil microbial communities to typical artificial plantations with  
927 different ages in a loess area. Masters Dissertation, Northwest A & F University,  
928 (2017).
- 929 161. Zang et al. Effects of grazing on microbial community structure diversity in  
930 rhizosphere soil of *Artemisiafrigida*. *Acta Agrestia Sinica*, 25, 982-992 (2017).
- 931 162. Yang et al. Comparison of soil microbial communtiy composition and structure in  
932 *Tricholoma matsutake shiro* and non-shiro soils in *Quercus semecarpifolia* and *Pinus*  
933 *densata* forests. *Acta Ecologica Sinica*, 38, 1630-1638 (2018).
- 934 163. Wu. The research on soil nutrition and relationship with the composition of the  
935 microbial communities in different forests of Changbai mountain. Masters Dissertation,  
936 Northeast Forestry University, (2012).
- 937 164. Sun. Interactions of water and nitrogen addition on soil microbial community  
938 composition and functional diversity depending on the inter-annual precipitation in a  
939 Chinese steppe. *Journal of Integrative Agriculture*, 14, 788-799 (2015).
- 940 165. Wang et al. Soil microbial community composition rather than litter quality is linked  
941 with soil organic carbon chemical composition in plantations in subtropical China.  
942 *Journal of Soils Sediments*, 15, 1094-1103 (2015).
- 943 166. Pan. Soil carbon and nitrogen transfromation process research of relationship between  
944 soil microbial community sturcture of *Michelia maclurei*, *Pinus massoniana* plantation  
945 Masters Dissertation, Guangxi University, (2015).
- 946 167. Qin et al. Effects of wetland vegetation on soil microbial composition: a case study in  
947 Tumen river basin, Northeast China. *Chinese Geographical Science*, 27, 239-247  
948 (2017).
- 949 168. Huang. Soil microbial indices response to vegetation natural rehabilitation on the loess

- 950 hilly-gully area. PhD Dissertation, Northwest A & F University, (2008).
- 951
- 952 169. Brant et al. Microbial community utilization of added carbon substrates in response to  
953 long-term carbon input manipulation. *Soil Biology & Biochemistry*, 38, 2219-2232  
954 (2006).
- 955 170. Chang. The study of microbial community diversity and function along glacier  
956 foreland in Ny-Alesund, Arctic. PhD Dissertation, Wuhan University, (2016).
- 957 171. Chen et al. Microbial community structure of three typical gymnosperms soil in scenic  
958 area of Maijishan, Gansu Province. *Microbiology China*, 43, 1939-1944 (2016).
- 959 172. Chi et al. Research on soil microbial community structure of different forest-wetland  
960 ecotones in Xiaoxing'an Mountain. *Forest Engineering*, 3, 6-13 (2018).
- 961 173. Gu et al. Soil microbial community structure, enzyme activities, and their influencing  
962 factors along different altitudes of Changbai Mountain. *Acta Ecologica Sinica*, 37,  
963 8347-8384 (2017).
- 964 174. Li et al. Effects of nitrogen and phosphorus addition on soil microbial community in a  
965 secondary tropical forest of China. *Biology & Fertility of Soils*, 51, 207-215 (2015).
- 966 175. Liu et al. Soil microbial community structure and functional diversity marked by PLFA  
967 in forestland. Masters Dissertation, Beijing Forestry University, (2016).
- 968 176. Liu et al. Effect of different land use types on soil aggregates microbial biomass and  
969 community composition in the loess hilly region of west Henan. *Pratacultural Science*,  
970 35, 771-780 (2018).
- 971 177. Lu et al. Soil labile organic carbon and nitrogen pools and associated microbial process  
972 under three forest types in Australia. PhD Dissertation, Jiangxi Agricultural University,  
973 (2011).
- 974 178. Luo et al. Characteristics of carbon and nitrogen in monoculture and mixed young

975 stands of *Erythrophleum fordii* and *Pinus massoniana* in southern subtropical China.  
976 PhD Dissertation, Chinese Academy of Forestry, (2014).

977 179. Wu et al. Effects of precipitation change on soil microbial community of the monsoon  
978 evergreen leaved forest in Dinghushan biosphere reserve. Masters Dissertation,  
979 Guangzhou University, (2017).

980  
981  
982  
983  
984  
985  
986  
987  
988  
989  
990  
991  
992  
993  
994  
995  
996  
997  
998  
999
